# Supplementary material for: Differences in the Gene Expression Profiles of Slow- and Fast-Forming Preinduced Pluripotent Stem Cell Colonies
Source: Hindawi journal article supplement (doi:10.1155/2015/195928), 2015-01-01
Supplement: f1 [file 195928.f1.pdf]

**Supplementary Table S1. Primer sequence information (pluripotency genes)**

| Gene                  | Primer sequence                                      |                                                      | Accession#<br>(mouse) |
|-----------------------|------------------------------------------------------|------------------------------------------------------|-----------------------|
|                       | 1 <sup>st</sup> round PCR                            | 2 <sup>nd</sup> round PCR                            |                       |
| <b><i>Dnmt3l</i></b>  | ATGATGGACACCAGAGTTAC<br>AAAAGCCCAAACCTTTAGT          | TGCTGTTCCGGGGGTACCCT<br>AGGCTCAGTACCCGCACTGG         | NM_019448.3           |
| <b><i>Ctnnb1</i></b>  | CATTAATAGCAGCCTTTCTC<br>CTACACCATTACTCGGTTCT         | AACCAAGCTGAGTTTCCTAT<br>AGAACATAAACTACTTAAA          | NM_007614.3           |
| <b><i>Lin28a</i></b>  | AAATTATGAAGACGAGGTG<br>TGTGTTCTATTGCATTGTGTC         | GGAATCTGGGCTTCATTGT<br>TTAGCTATCAACCATCACGCT         | NM_145833.1           |
| <b><i>Fbxo15</i></b>  | AATTACGCAAGTCTGCTAT<br>ATCTCCATAAAAGGTCATTG          | TCTGTGTAAATCCTGGCCTC<br>CACAAATGTAGTGTCTGGGAG        | NM_015798.3           |
| <b><i>Dppa3</i></b>   | AAGATGAGAAGACTTGTTCTG<br>AAATAGCTTTACATCTGCT         | TTGAGCAGAGACAAAAAAGG<br>TGTAAGCTCCTAATTCTTCC         | NM_139218.1           |
| <b><i>Klf5</i></b>    | GATAGACAAGCTGAGATGCT<br>TATAAACTTTTGTGCAACCA         | CCGCTACATTGCTTCCAAAC<br>TTCTCCAGATCCGGGTTACT         | NM_009769.4           |
| <b><i>Slc38a5</i></b> | CACACTGGAGTCATCTTCTT<br>AACAGGTAAGTGGACATAGC         | ATTGCTCTCTGTCTTCTTA<br>TTCCCGGCAGGTCCAAATGC          | NM_172479.2           |
| <b><i>Fzd7</i></b>    | TGGTTGAGATAAACATTCCT<br>AAAACAAAAACAGCAAAAAT         | TACCCATTGAGGCACACGTT<br>TGAATTAATCTGTTTAAACAAATA     | NM_008057.3           |
| <b><i>Nanog</i></b>   | CTAGCAATGGTCTGATTGAGAAG<br>TAGTGGCTTCCAAATTCACCTCC   | CACCAGTGGAGTATCCAGCAT<br>TGGCAGAGAAGTTTGTGCAAC       | NM_028016.2           |
| <b><i>Oct4</i></b>    | CCCAGGGGGGGCTGTATCCTT<br>CACTGAGCTTCTTTCCCATCC       | CCCAGGTCCCCACTTTGGCAC<br>ACCCCTGTTGTGCTTTAATCCC      | NM_001252452.1        |
| <b><i>Dppa5a</i></b>  | CTGAAGAACCTGGAATCTC<br>ATTTAGAGTGGTAACCTTGG          | GAAGAACTTATCGAGGTCTT<br>GACTGGAACTGGCTTCACT          | NM_025274.3           |
| <b><i>Dppa4</i></b>   | AGTGCCAGCCGATGCTTCGT<br>GATTTCTATCAGTCTCAGCGT        | TCCTGGGAACTCGCGTGGTT<br>TTGGGGCACAGCATGTTGTC         | NM_028610.2           |
| <b><i>Klf4</i></b>    | AGTTTTGTCTTCCGATCTACATTG<br>TACATATTTATTAAGGCAAGGAAC | GGTTTATTTCTGTAACATTTTATG<br>TTAAAGGCATACTTGGGAATAAAC | NM_010637.3           |
| <b><i>Gapdh</i></b>   | GACCTCAACTACATGGTCTACAT<br>GAGTGAGTTGTCATATTTCTCGT   | TGGAGAAGGCCGGGGCCAC<br>AAACATGGGGGCATCGGCAG          | NM_008084.2           |

**Supplementary Table S2. Primer sequence information (reprogramming-related genes)**

| Gene          | Primer sequence                              |                                              | Accession#                    |
|---------------|----------------------------------------------|----------------------------------------------|-------------------------------|
|               | 1 <sup>st</sup> round PCR                    | 2 <sup>nd</sup> round PCR                    |                               |
| <i>Jmjd3</i>  | CTCACCATCAGCCACTGTG<br>AGCTCTCACAGGGCCAGAT   | TGCCAGCAAGAATGCCAAG<br>CCAGAGTCTTGGTGGAGAAA  | NM_001017426.1                |
| <i>Jhdm2a</i> | AGCATTCTTGGCTTTGACA<br>CATCAGATCATCAAACCTG   | GGCAGCCAGTGATGGTGT<br>CCTTAAGTTTCAACACCATTG  | NM_001038695.2                |
| <i>Jhdm3a</i> | TTCTACCAAGTGTGAGGTG<br>TCTCATTGAAGCCCATGTC   | CATAGTGAGTCAGGACTGTC<br>AGTCTAGACTTGACTCTCTT | NM_001161823.1                |
| <i>Tet2</i>   | GGAGGAAGGCAGTGACATC<br>ATAAACTGCATTATAACA    | CGATACAAGTGCTTCTGCT<br>AAAAAAACCCTAACAAAGTT  | NM_001040400.2                |
| <i>Tet3</i>   | GGCATGGCTACACTTCAT<br>GGCTCGGCTGCCACTGTGT    | TTCTCTCCTCCCTCTCCCT<br>GTTCTCATTTTCAAAGAGC   | NM_183138.2                   |
| <i>Glp</i>    | TGGTCAAGTATGAGCTGATGC<br>TGCTATGGTCACCTCTTTG | GCGCCCACCAACAAAGCA<br>CCTTGAAGCTTCTTCCCC     | NM_001012518.2                |
| <i>Dnmt3a</i> | TCAAGGAGATCATTGATG<br>TGTTCCACACATGAGCA      | GCGCACAAGGGAGCGGCTG<br>AGATGGTGCAATAGGACTG   | NM_007872.4<br>NM_001271753.1 |
| <i>Dnmt3b</i> | CCTACCCGGAATGAACAG<br>ACAGGCAAAGTAGTCCTTC    | AGCTCGAGCTGCAGGACT<br>AGATCCTTTCGAGCTCAGTG   | NM_001003960.3                |
| <i>Lsd1</i>   | TCTGGCTTGGCAGCAGCTC<br>GTGGCTTCTAGCAACCGGT   | ACTTCTGGAAGCCAGGGATC<br>CTTGATCTTGGCCAGTTCCA | NM_133872.2                   |
| <i>Dnmt1</i>  | CAGTGGCATGAACCGCTTCA<br>GTCTGGGCCACGCCATACT  | GCTACTGTGACTACTACCG<br>AAAGGTGCACTGGTAGCC    | NM_010066.4                   |
| <i>Setdb1</i> | CACACGCCAGTTCTATGA<br>TCAGGAAGACCCAGTTCTT    | GGCCGCTACCTCAATCAC<br>CCGGATTCTCTTGCTGGC     | NM_001163641.1                |
| <i>Ezh1</i>   | TGCGGCTATGCCTGGTTGG<br>GTTTTTGTGTCAAGTCAGC   | GCTTCTTCAGGGTAGCTG<br>TCCTCTTCTCTTCAGAA      | NM_007970.2                   |
| <i>Ezh2</i>   | CCGCAGAAGAGGAAGACTT<br>GTTTCCTTTCTTCTTTCT    | ACCATCAGTGTGCTGGAGT<br>CCAATGAGGACTCTAAACA   | NM_007971.2                   |
| <i>G9a</i>    | GACAGAACGCGGTTTGAG<br>CAGGCCTTATGGAAGCGG     | CCGCATGGAGGCTCCCAAG<br>ATGCGGGCTCGATGGGCCT   | NM_145830.1                   |
| <i>Eed</i>    | CTGAGTGCTGATTATGATC<br>TATGAGGATCTTCTACTTC   | TTCCTGACTTTTCTACCAG<br>ACTTGAAAGTATCAAATC    | NM_021876.3                   |
| <i>Wdr5</i>   | TTTTTCTCTGTGGTTGTTG<br>CCAGAGACCTTTCCAATC    | GAACAGGACCTACAGCCCT<br>TCCATACCCACCTTTTATT   | NM_080848.2                   |
| <i>Brg1</i>   | AGGAGTACCTCAACAGCAT<br>TGCTTCTTCTTTTCTTT     | TCACAGATCAGTCACAGGC<br>TGTCTGCTGCAGAAGGTAG   | NM_001174078.1                |
| <i>Baf155</i> | GCCCCGAGCAAATGGAGC<br>GGCTAGGGAGTGGCCGAGG    | GCACCATCAGATGCCGCCA<br>GATGTTTCCGGGCATTGGA   | NM_009211.2                   |
| <i>Dot1</i>   | GTGGACAGTCCGCTACAGG<br>TTGCGTTGCCCTCACCTT    | GGGGGCCTTGCTGCAGACC<br>TTGGCCTCTGTGGTACTGT   | NM_199322.1                   |
| <i>p53</i>    | TTGCGTTGCCCTCACCTT<br>ACAACCTGGCTGGATAGAAT   | AGACCAAGAAGGGCCAGTC<br>GGCTGGTGATGGGGACGGG   | NM_011640.3                   |

## Supplementary Figure legends

**Fig. S1.** Expression levels of pluripotency genes in NGFP-mEFs and 4F2A-mEFs. **A**, Multiplex RT-PCR results. Each RT-PCR set-up employed about 3,000 cells as a template, which were repeated four times. Wherever PCR bands are present are denoted by gene symbols with purple dots. **B**, Expression levels of pluripotency genes. Error bars, the standard deviation of the mean (STD). *Gapdh* level = 1.0

**Fig. S2.** Density profiles of gene expressions in single pre-iPSC colonies in NGFP, 4F2A, and mESC groups. Insets, corresponding gel images.

**Fig. S3.** A quantitative real-time PCR. Complementary DNAs obtained from pooled colonies (20 per group) were analyzed for *Nanog*, *Dppa5a*, and *Dppa4*. One-way ANOVA and the Bonferroni post hoc test were used for statistical analysis. Asterisks ( $p < 0.001$ ) denote a significant difference between samples. Error bars, standard deviation.

**Fig. S4.** Gene expression profiles (GEPs) of representative pre-iPSC colonies with the lowest (minimal weighted root mean square deviation, [min wRMSD] in green) and the highest wRMSD (max wRMSD in purple) are shown along with the mean GEP (in red) for each group.

**Fig. S5.** Single-gene RT-PCR using cDNA from J1 mESCs. The size of PCR amplicon for the indicated reprogramming-related genes is indicated below.

**Fig. S6.** Multiplex RT-PCR for reprogramming-related genes using single pre-iPSC colonies. Above, a representative gel image (left) and the relative PCR band

positions of the genes analyzed (right). Below, gel images of multiplex RT-PCR products. DNA markers are also shown in each gel.

Figure S1

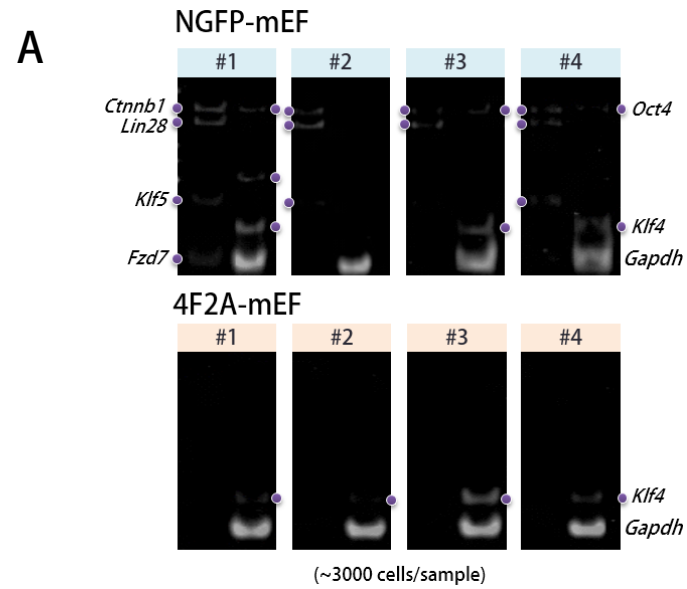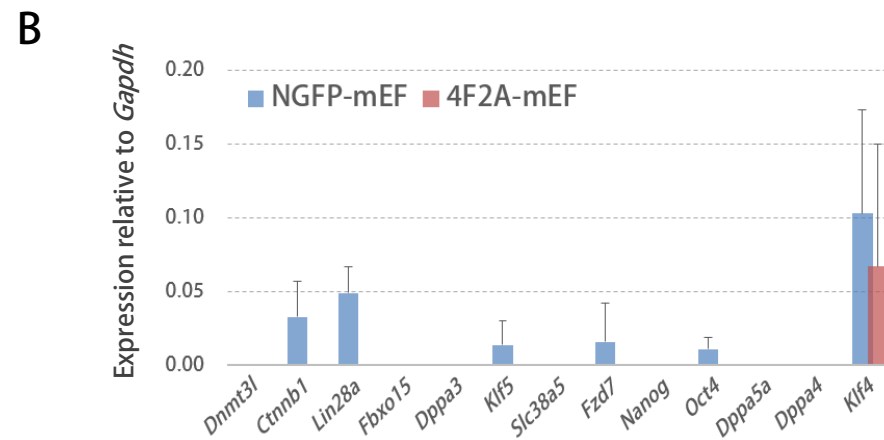

**Fig. S1.** Expression levels of pluripotency genes in NGFP-mEFs and 4F2A-mEFs.

Figure S2

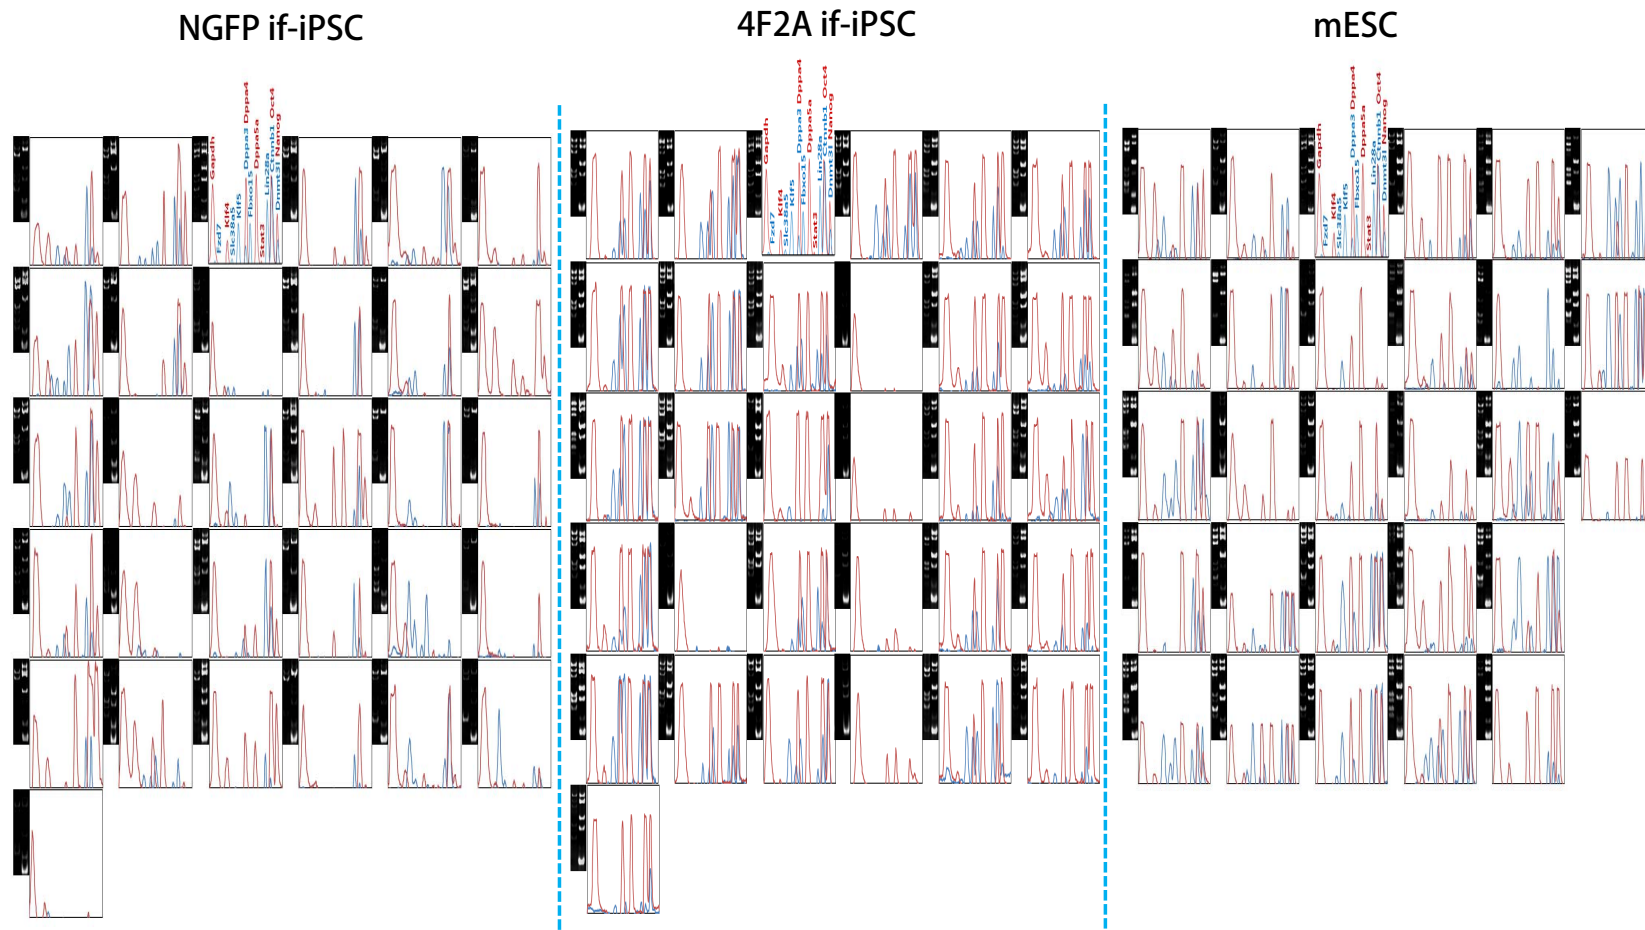

**Fig. S2.** Density profiles of gene expressions in single if-iPSC colonies

Figure S3

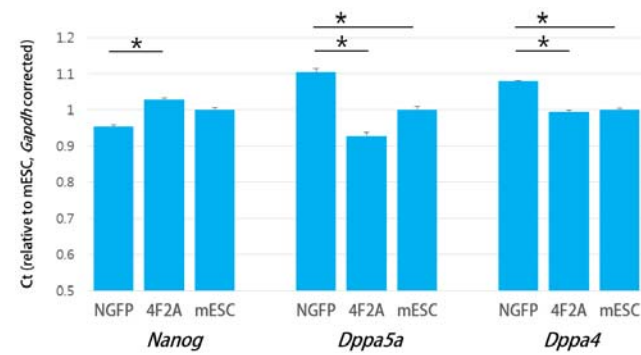

Fig. S3. A quantitative real-time PCR.

Figure S4

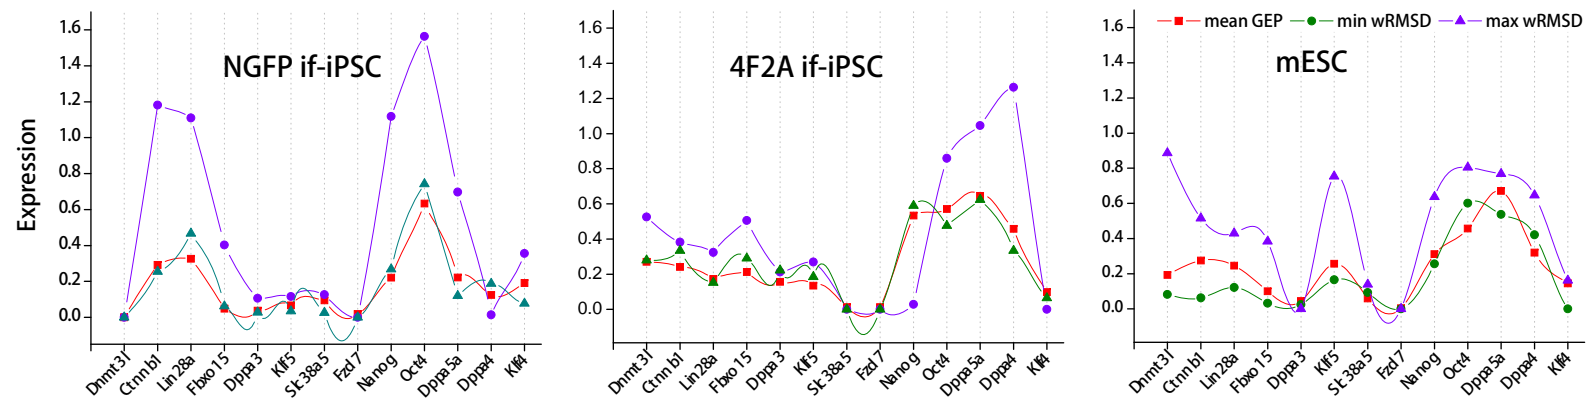

Fig. S3. Gene expression profiles (GEPs) of representative if-iPSC colonies with different wRMSDs

Figure S5

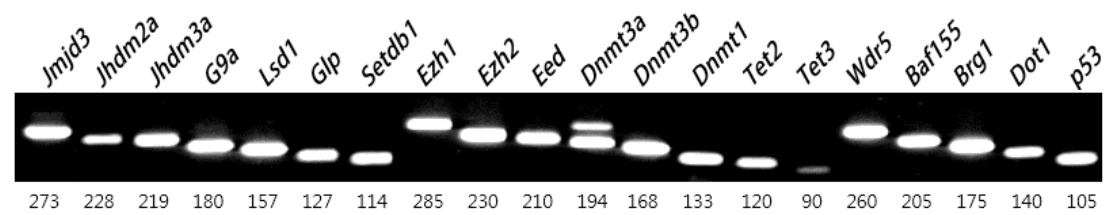

**Fig. S4.** Single-gene RT-PCR using cDNA from J1 mESCs.

Figure S6

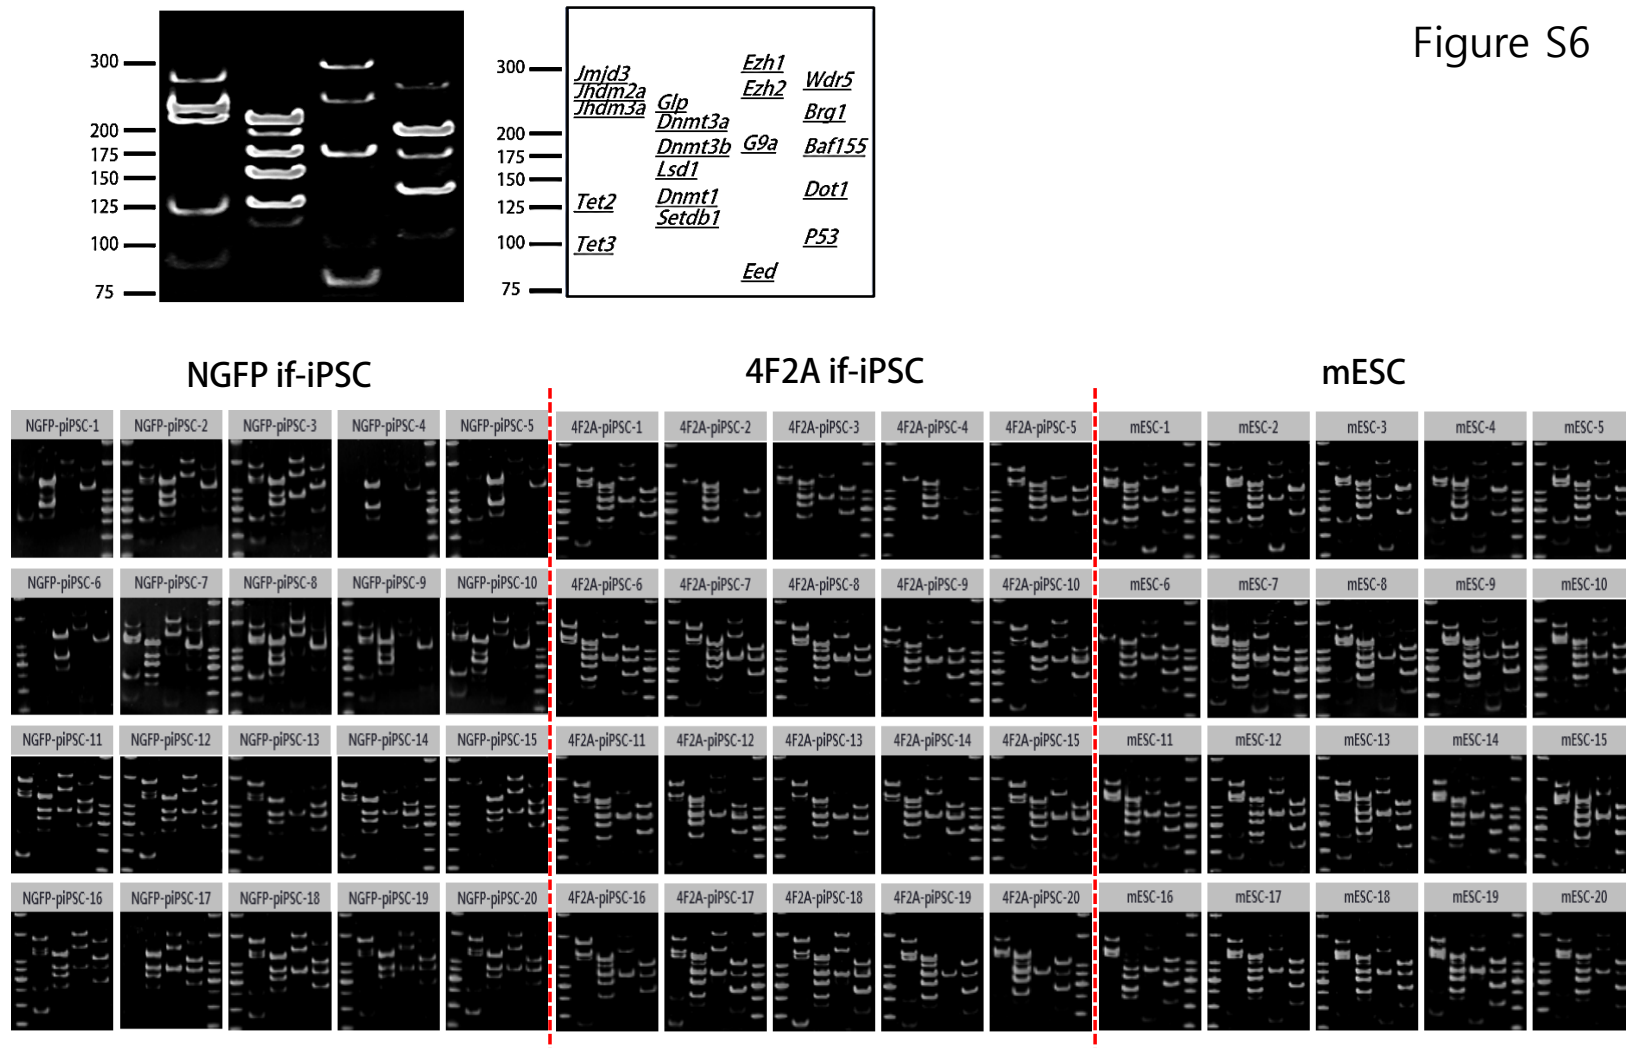

Fig. S5. Multiplex RT-PCR for reprogramming-related genes using single if-iPSC colonies.
